# Supplementary material for: Role of TRPC3 in Right Ventricular Dilatation under Chronic Intermittent Hypoxia in 129/SvEv Mice
Source: MDPI journal article supplement (doi:10.3390/ijms241411284), 2023-07-10
Supplement: s1 [file s1]

## Supplementary Figure S1

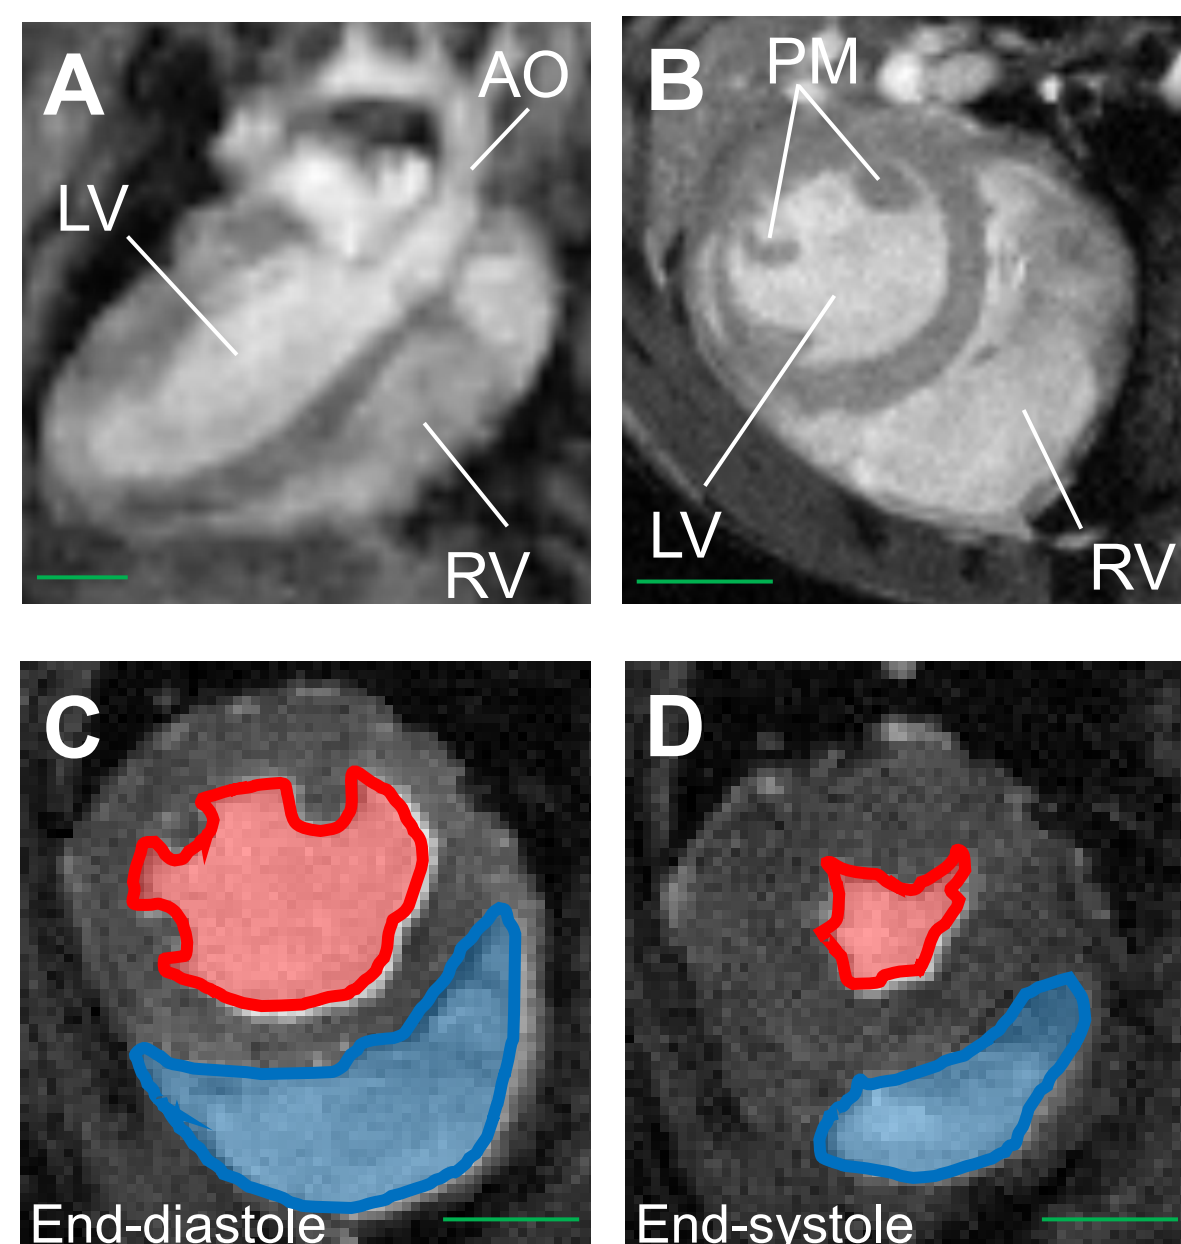

**Supplementary Figure S1.** Representative long and short axis cardiac MRI images of a mouse heart. **A.** End-diastole MR image in longitudinal orientation orthogonal to the interventricular septum. **B.** End-diastolic short-axis images at mid-ventricular level. Detailed cardiac compartments is indicated (Bar = 2 mm). **C, D.** Tracing short-axis MR images for end-diastole (C) and end-systole (D) volume determination of the left (red) and right (blue) ventricle. AO; aorta, LV, left ventricle; PM, papillary muscle, RV; right ventricle

Supplementary Figure S2

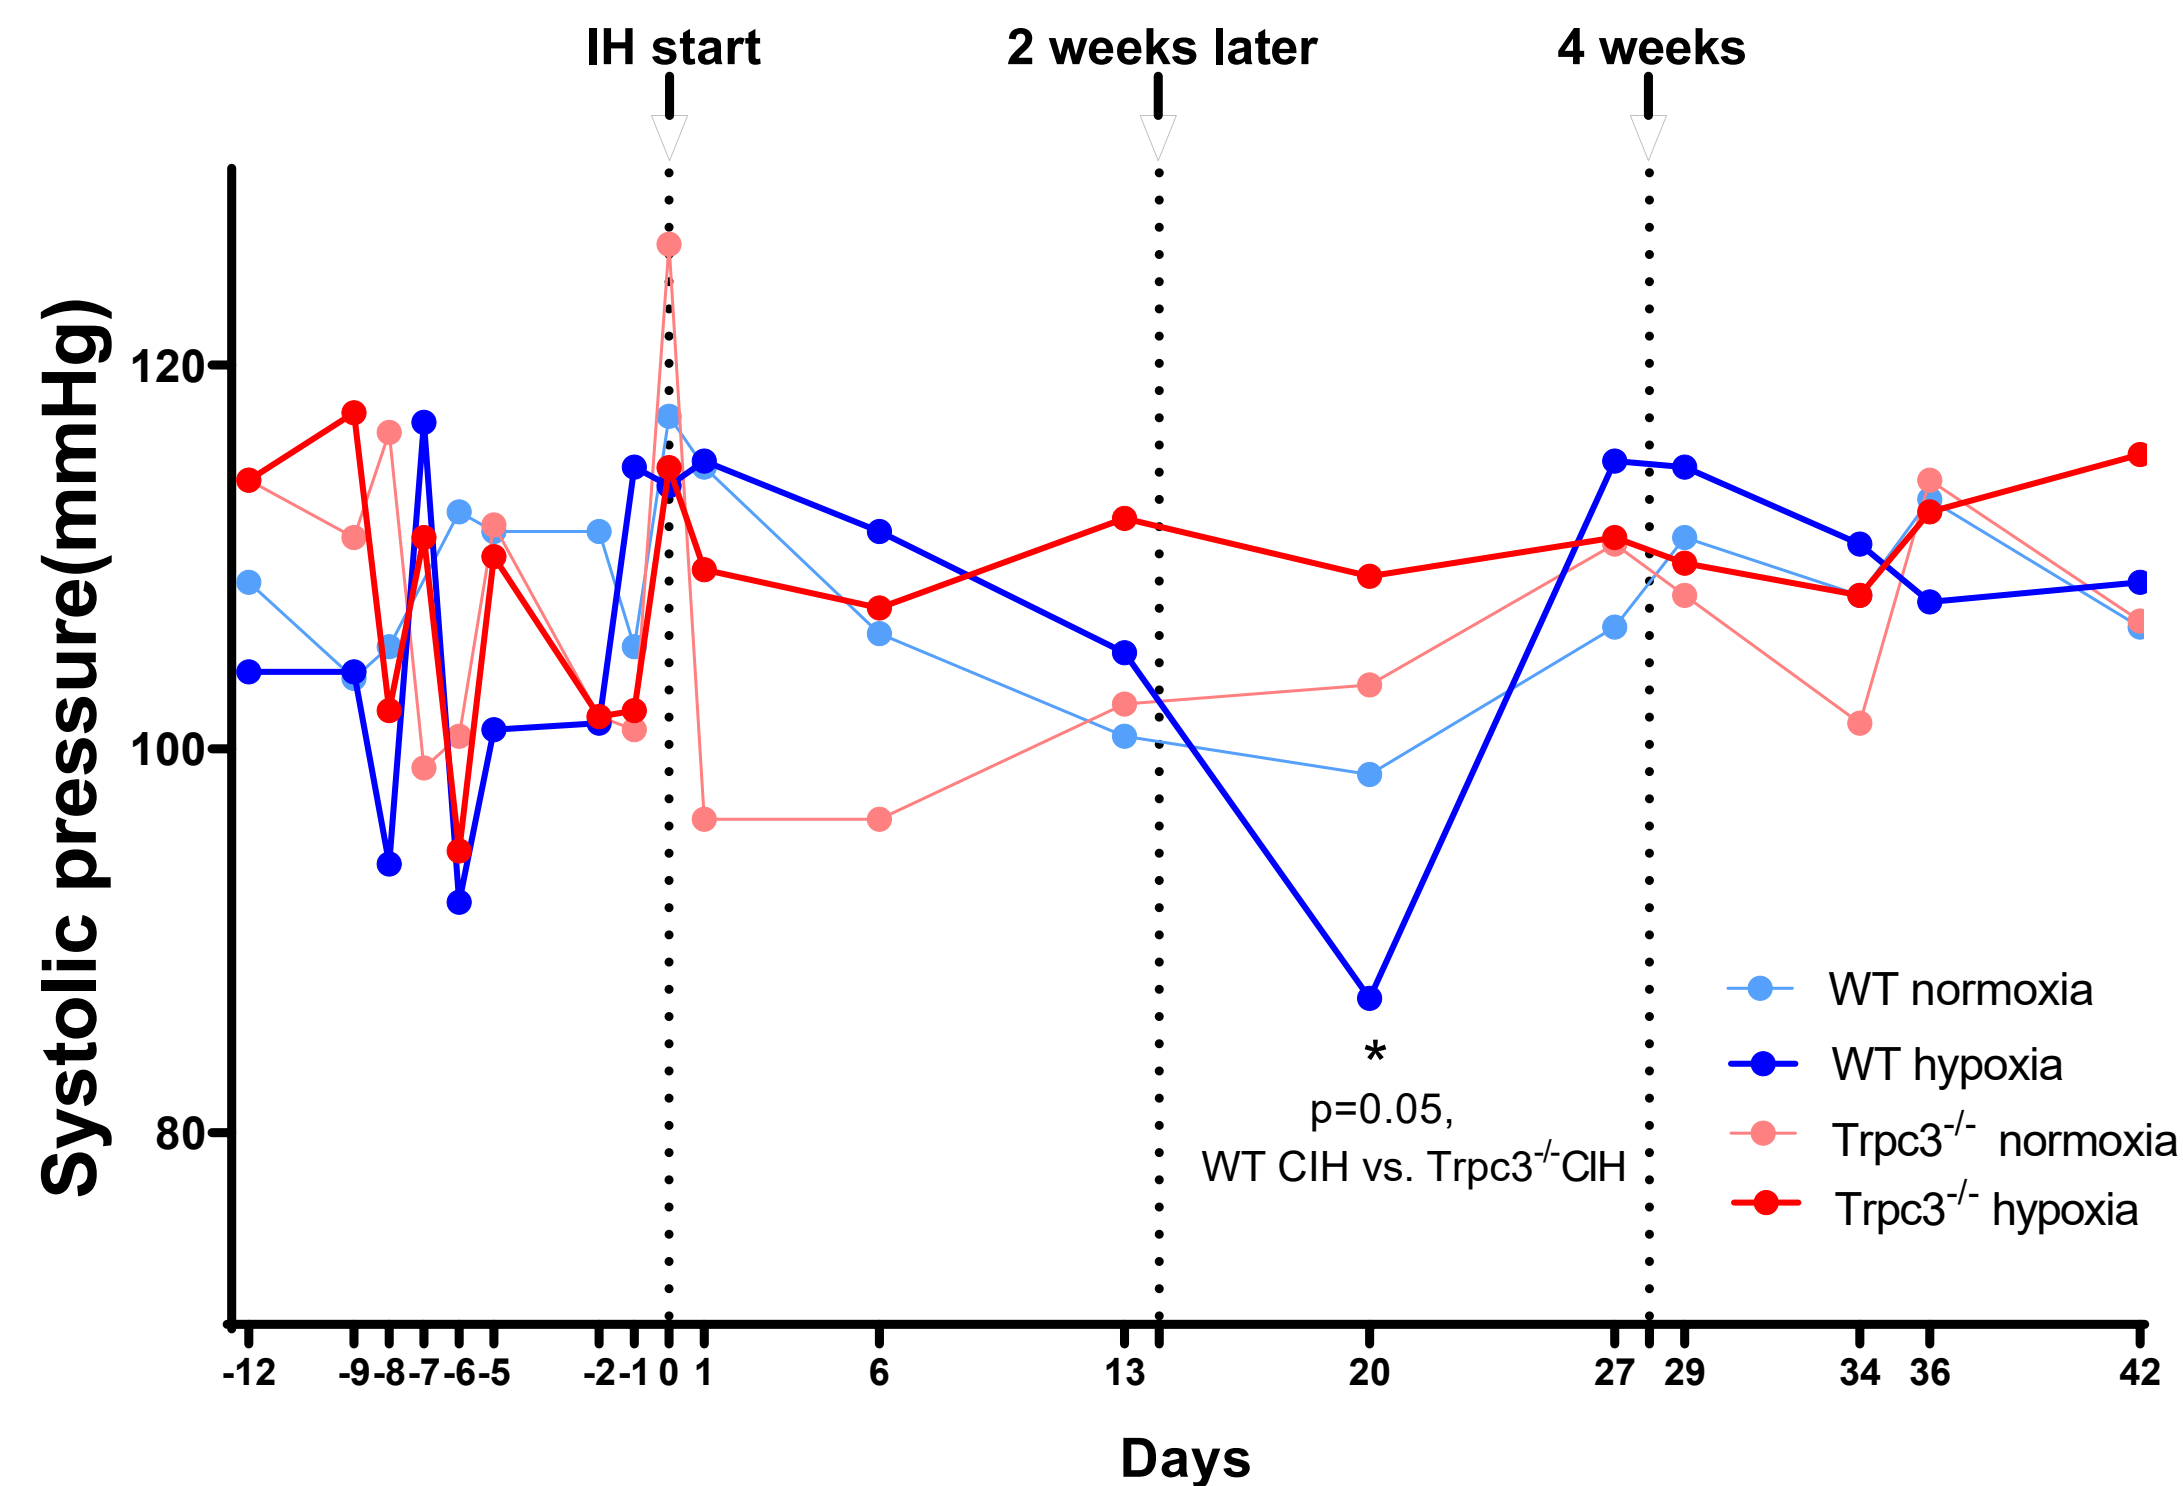

**Supplementary Figure S2.** Systolic blood pressure (BP) of WT and Trpc3<sup>-/-</sup> mice for 7 weeks of CIH condition. To analyze the effect of Trpc3 deletion on the CIH induced cardiovascular changes, we measured BP 2 weeks before chamber implement and 7 week after CIH condition. The BP was not significantly changed after CIH condition, except the BP of WT mice were significantly dropped at 3 weeks of CIH condition. Mouse BP was measured with noninvasive equipment, the two-chamber model of the BP-2000 BP analysis system (Visitech, Apex, NC, USA). Mice were adapted to caging in the measuring chamber and trained for tail cuff manipulation for 2 weeks before initiation of experiments. We monitored BP for approximately 2 weeks before treated in CIH chamber and 7 weeks of CIH treatment. The stage platforms were heated to 37°C. Ten primary BP measurements were taken, and 25 actual measurements were recorded. A minimum of five successful daily measurements were used in subsequent analyses.



**A**

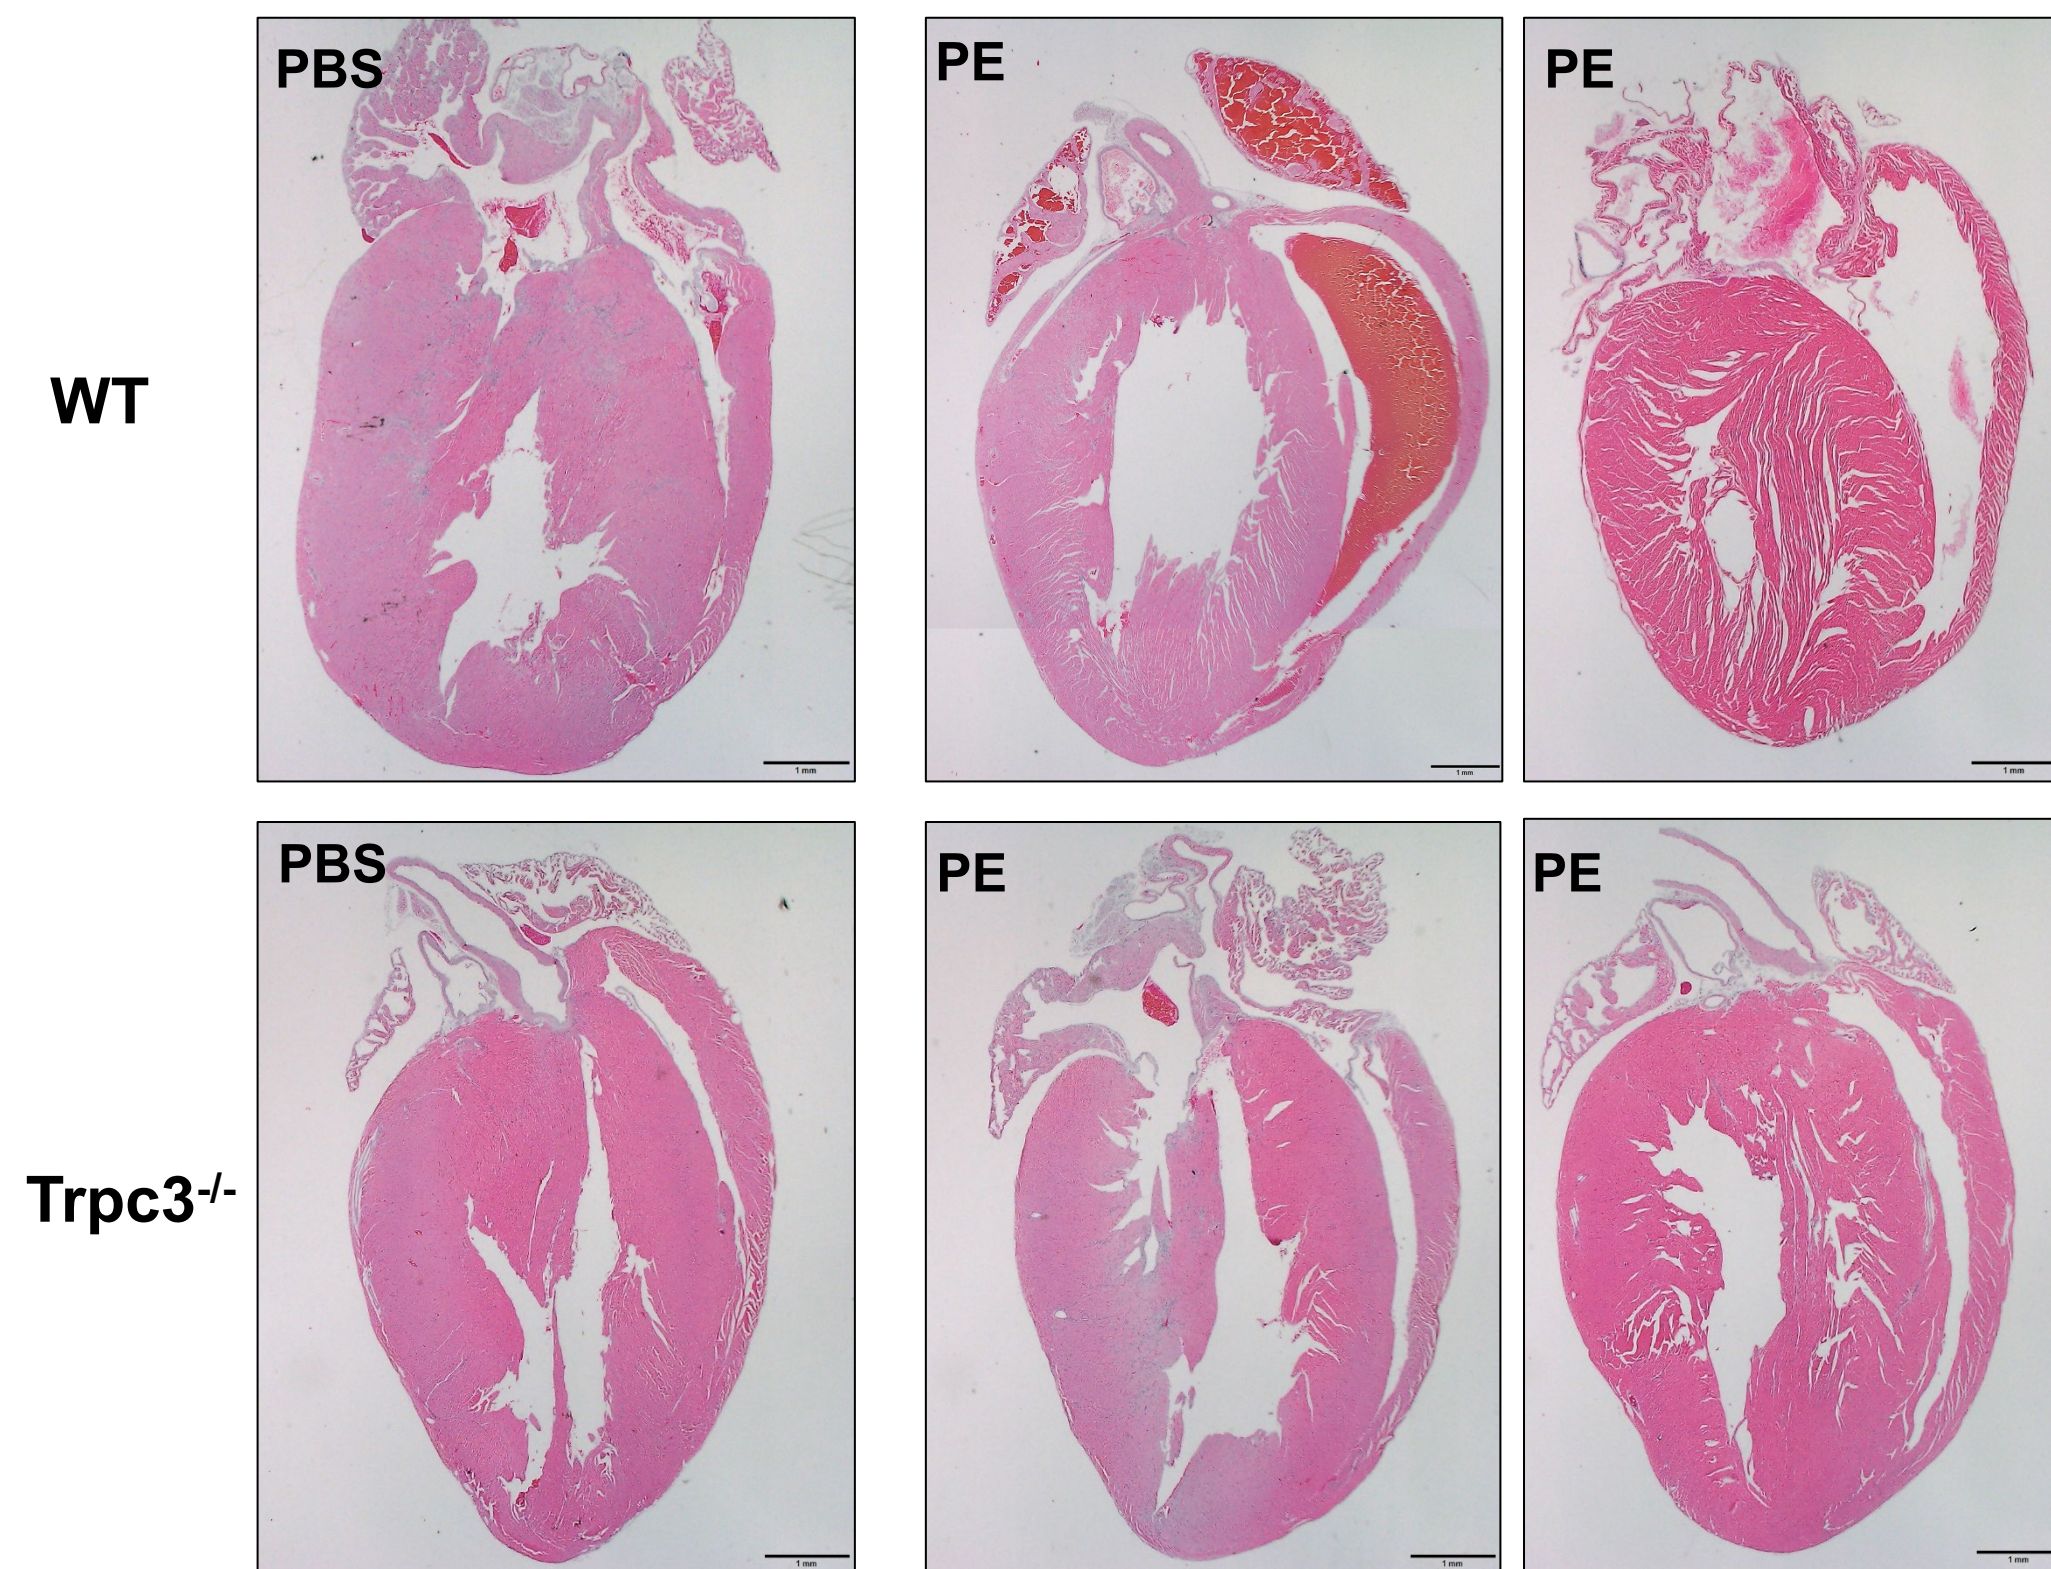

**B**

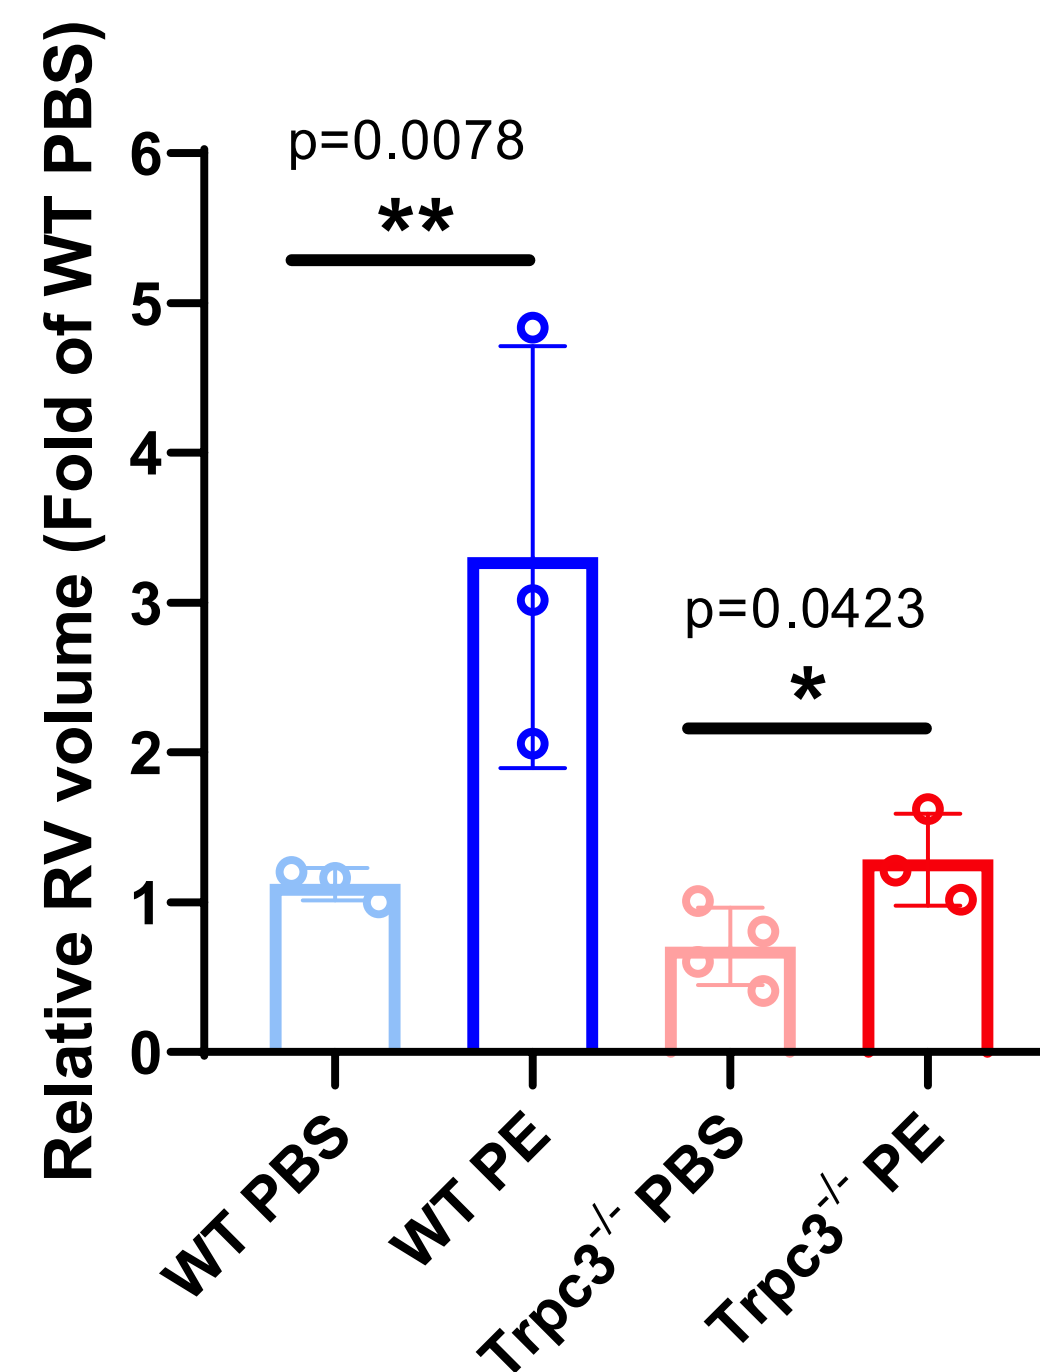

**Supplementary Figure S3. A.** The histology observed after H&E staining of WT and *Trpc3*<sup>-/-</sup> mice hearts after 4 weeks of PE implantation. **B.** Resistance of RV dilation of *Trpc3*<sup>-/-</sup> mice. Relative RV volume of WT and *Trpc3*<sup>-/-</sup> mice treated with PBS or PE were analyzed. Data are expressed as mean  $\pm$  SE (n=3).
